# Supplementary material
Source: PubMed Central journal article supplement (PMC5959051)
Supplement: NIHMS962074-supplement-2.pdf [file NIHMS962074-supplement-2.pdf]

Figure S1 - Related to Figure 1

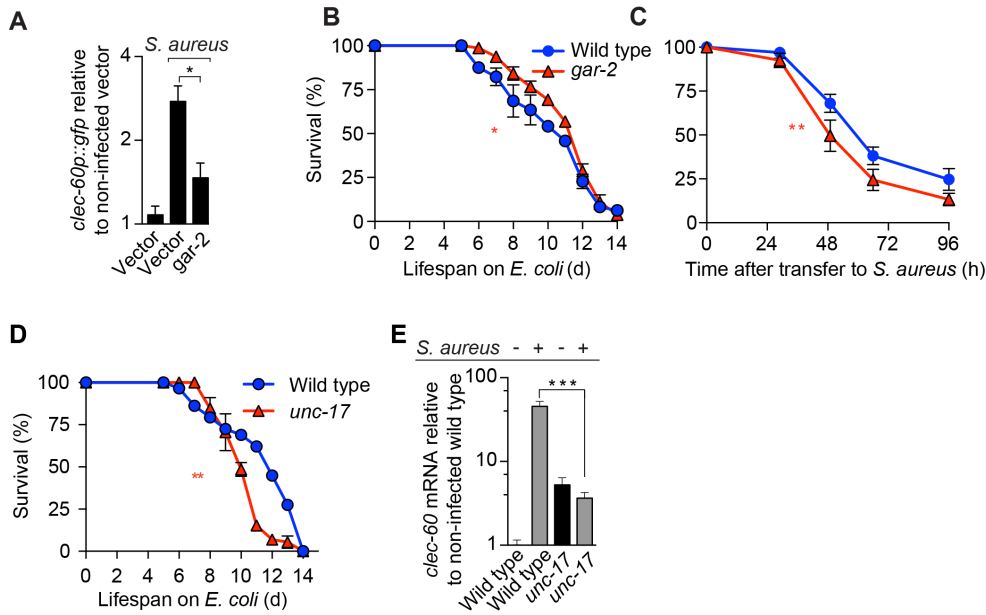

**Figure S1-Related to Figure 1:** (A) Quantitative analysis of *clec-60::gfp* animals that were reared on *E. coli* carrying empty vector or RNAi against *gar-2* and subsequently infected with *S. aureus* for 16 h. Data are mean  $\pm$  SEM (at least two biological replicates,  $n \geq 50$  per condition). \*  $p \leq 0.05$  (two-sample two-tailed *t* test). (B) Survival of wild type and *gar-2* mutant animals infected with *S. aureus*. Results are representative of 2 biological replicates. \*\*  $p \leq 0.01$  (Log-Rank test). (C) Lifespan of wild type and *gar-2* mutant animals on *E. coli* OP50. Results are representative of 2 biological replicates. (D) Lifespan of wild type and *unc-17* mutant animals on *E. coli* OP50. Results are representative of 2 biological replicates. \*\*  $p \leq 0.01$  (Log-Rank test). (E) qRT-PCR of *clec-60* in wild type and *unc-17* mutant animals infected with *S. aureus* for 8 h. Results are normalized to non-infected wild type animals. Data are mean  $\pm$  SEM (two biological replicates,  $n \geq 500$  per condition). \*\*\*  $p \leq 0.001$  (two-sample *t* test).

Figure S2 - Related to Figure 4

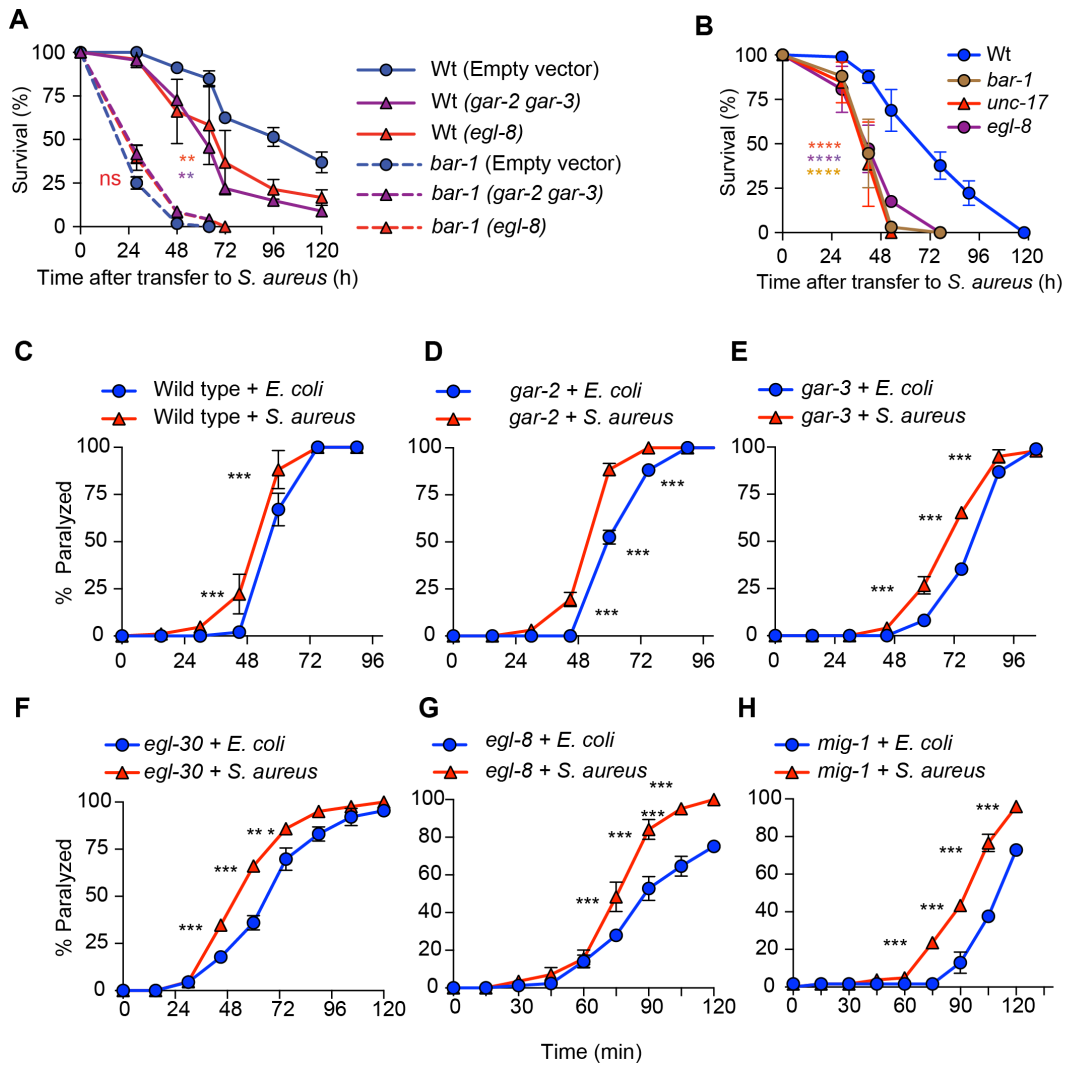

**Figure S2-Related to Figure 4:** (A) Survival of wild type and *bar-1* mutant animals grown on empty vector, *gar-2* and *gar-3*, or *egl-8* RNAi, and subsequently infected with *S. aureus*. Results are representative of 2 biological replicates. \*\*  $p \leq 0.01$  (Log-Rank test). (B) Survival of wild type, *unc-17*, *egl-8* and *bar-1* mutant animals infected with *S. aureus*. Results are representative of 2 biological replicates. \*\*\*\*  $p \leq 0.0001$  (Log-Rank test). (C-H) Aldicarb paralysis of wild type (C) or mutant animals (D-H) either infected with *S. aureus* or fed with non-pathogenic *E. coli* for 30 min. The error bar at each time point represents the mean of three trials (25-30 animals tested in each trial) and s.e.m. \*\*\*  $p \leq 0.001$  (two-way ANOVA).

Figure S3 - Related to Figure 6

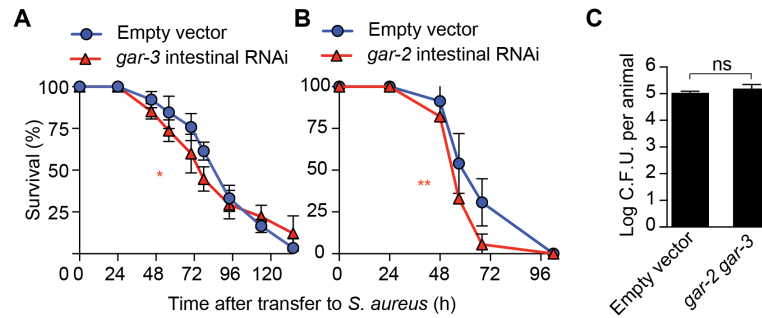

**Figure S3-Related to Figure 6:** Survival of MGH167 animals, which were subjected to RNAi against *gar-2* (A) or *gar-3* (B) until young adulthood, and subsequently infected with *S. aureus*. Results are representative of 2 biological replicates. \*\*\*  $p \leq 0.001$  (Log-Rank test). (C) *S. aureus* accumulation in RNAi-treated animals after 8 h of infection, expressed as cfu per animal. Data are mean  $\pm$  SEM (3 replicates). Differences between groups were not statistically significant (two-sample t test).

Figure S4 - -Related to Star Methods

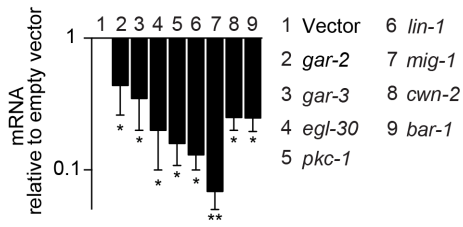

**Figure S4-Related to Star Methods:** qRT-PCR of *gar-2*, *gar-3*, *egl-30*, *pkc-1*, *lin-1*, *mig-1*, *cwn-2* and *bar-1* in lysates from animals treated respectively with, *gar-2*, *gar-3*, *egl-30*, *pkc-1*, *lin-1*, *mig-1*, *cwn-2* and *bar-1*. Results are normalized to empty vector treated animals. Data are mean  $\pm$  SEM (two biological replicates, two technical replicates,  $n \geq 3,000$  per condition) \*  $p \leq 0.05$  (two-sample t-test).

Figure S5 - Related to Figure 7

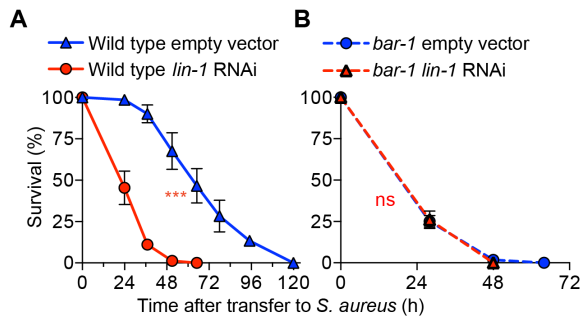

**Figure S5-Related to Figure 7: (A)** Survival of wild type animals grown on empty vector or *lin-1* RNAi, and subsequently infected with *S. aureus*. Results are representative of 2 biological replicates. \*\*\*  $p \leq 0.001$  (Log-Rank test). **(B)** Survival of *bar-1* mutant animals treated as in (H). Results are representative of 2 biological replicates. ns,  $p > 0.05$  (Log-Rank test).
